# Supplementary material
Source: HighWire-hosted journal article supplement (http://ajnr-stage2.highwire.org/highwire/filestream/91670/field_highwire_adjunct_files/0/0074.pdf)
Supplement: 0074.pdf [file 0074.pdf]

Table 2 – Rater’s success in predicting infarcted territories

|            | Rater correctly predicted 0<br>infarcted territory out of 4 regions<br>(OL, T, B and C) | Rater correctly predicted 1<br>infarcted territory out of 4 regions<br>(OL, T, B and C) | Rater correctly predicted 2<br>infarcted territory out of 4 regions<br>(OL, T, B and C) | Rater correctly predicted 3<br>infarcted territory out of 4 regions<br>(OL, T, B and C) | Rater correctly predicted 4<br>infarcted territory out of 4 regions<br>(OL, T, B and C) |
|------------|-----------------------------------------------------------------------------------------|-----------------------------------------------------------------------------------------|-----------------------------------------------------------------------------------------|-----------------------------------------------------------------------------------------|-----------------------------------------------------------------------------------------|
| Patient 1  |                                                                                         | ●                                                                                       | ●●●●                                                                                    |                                                                                         | ●                                                                                       |
| Patient 3  |                                                                                         |                                                                                         | ●●●●                                                                                    | ●●                                                                                      |                                                                                         |
| Patient 4  |                                                                                         | ●●●●                                                                                    | ●●                                                                                      |                                                                                         |                                                                                         |
| Patient 5  |                                                                                         |                                                                                         | ●●                                                                                      |                                                                                         | ●●●●                                                                                    |
| Patient 6  |                                                                                         |                                                                                         | ●                                                                                       | ●●●●                                                                                    | ●                                                                                       |
| Patient 7  |                                                                                         |                                                                                         | ●●●                                                                                     | ●●                                                                                      | ●                                                                                       |
| Patient 8  |                                                                                         |                                                                                         | ●●●                                                                                     | ●●                                                                                      | ●                                                                                       |
| Patient 9  |                                                                                         |                                                                                         | ●                                                                                       | ●●●●●                                                                                   |                                                                                         |
| Patient 10 |                                                                                         |                                                                                         | ●●                                                                                      | ●●●●                                                                                    |                                                                                         |
| Patient 11 |                                                                                         |                                                                                         | ●●●                                                                                     | ●●                                                                                      | ●                                                                                       |
| Patient 12 |                                                                                         |                                                                                         | ●                                                                                       | ●●●●                                                                                    | ●                                                                                       |
| Patient 14 |                                                                                         | ●●●●●                                                                                   | ●                                                                                       |                                                                                         |                                                                                         |
| Patient 15 | ●●●                                                                                     | ●●                                                                                      | ●                                                                                       |                                                                                         |                                                                                         |
| Patient 16 |                                                                                         | ●                                                                                       | ●●●                                                                                     | ●●                                                                                      |                                                                                         |
| Patient 17 |                                                                                         |                                                                                         | ●●●●                                                                                    | ●                                                                                       | ●                                                                                       |
| Patient 18 |                                                                                         |                                                                                         | ●●                                                                                      | ●●●                                                                                     | ●                                                                                       |
| Patient 19 |                                                                                         |                                                                                         | ●●●●●●                                                                                  |                                                                                         |                                                                                         |
| Patient 20 |                                                                                         |                                                                                         | ●                                                                                       | ●●●●●                                                                                   |                                                                                         |
| Patient 21 |                                                                                         |                                                                                         | ●●                                                                                      | ●●●                                                                                     | ●                                                                                       |
| Patient 22 |                                                                                         | ●●●●●                                                                                   |                                                                                         | ●                                                                                       |                                                                                         |
| Patient 23 |                                                                                         |                                                                                         |                                                                                         | ●●●●●                                                                                   | ●                                                                                       |
| Patient 24 |                                                                                         |                                                                                         |                                                                                         | ●                                                                                       | ●●●●●                                                                                   |
| Patient 25 |                                                                                         |                                                                                         | ●●●●●●                                                                                  |                                                                                         |                                                                                         |
| Patient 26 |                                                                                         |                                                                                         | ●●●●●                                                                                   | ●                                                                                       |                                                                                         |
| Patient 27 |                                                                                         |                                                                                         | ●●●                                                                                     | ●●                                                                                      | ●                                                                                       |
| Patient 28 | ●                                                                                       | ●                                                                                       | ●●●                                                                                     | ●                                                                                       |                                                                                         |
| Patient 29 |                                                                                         |                                                                                         | ●●●●●●                                                                                  |                                                                                         |                                                                                         |
| Patient 30 |                                                                                         |                                                                                         |                                                                                         |                                                                                         | ●●●●●●                                                                                  |
